# Supplementary material
Source: MDPI journal article supplement (https://www.mdpi.com/2073-4468/13/1/9)
Supplement: s1 [file s1]

**Table S1.** The table illustrates the formulas utilized to calculate derived glycan traits from integrated peaks generated by CGE-LIF and Empower 3 software.

| Glycan trait | Description                 | Calculation                                               |
|--------------|-----------------------------|-----------------------------------------------------------|
| G0           | agalactosylation            | $P14+P15+P18$                                             |
| G1           | monogalactosylation         | $P16+P17+P19+P20+P21+P22+P23+P24$                         |
| G2           | digalactosylation           | $P25+P26+P27$                                             |
| G            | galactosylation (G1+G2)     | $P16+P17+P19+P20+P21+P22+P23+P24+P25+P26+P27$             |
| S0           | asialylation                | $P14+P15+P16+P17+P18+P19+P20+P21+P22+P23+P24+P25+P26+P27$ |
| S1           | monosialylation             | $P5+P6+P7+P8+P9+P10+P11+P12+P13$                          |
| S2           | disialylation               | $P1+P2+P3+P4$                                             |
| S            | sialylation (S1+S2)         | $P1+P2+P3+P4+P5+P6+P7+P8+P9+P10+P11+P12+P13$              |
| CF           | fucosylation                | $P3+P4+P7+P8+P12+P13+P15+P18+P21+P22+P23+P24+P26+P27$     |
| CF0          | afucosylation               | $P1+P2+P5+P6+P9+P10+P11+P14+P16+P17+P19+P20+P25$          |
| B            | bisecting GlcNAc            | $P2+P4+P11+P13+P14+P18+P19+P20+P23+P24+P25+P27$           |
| B0           | absence of bisecting GlcNAc | $P1+P3+P5+P6+P7+P8+P9+P10+P12+P15+P16+P17+P21+P22+P26$    |

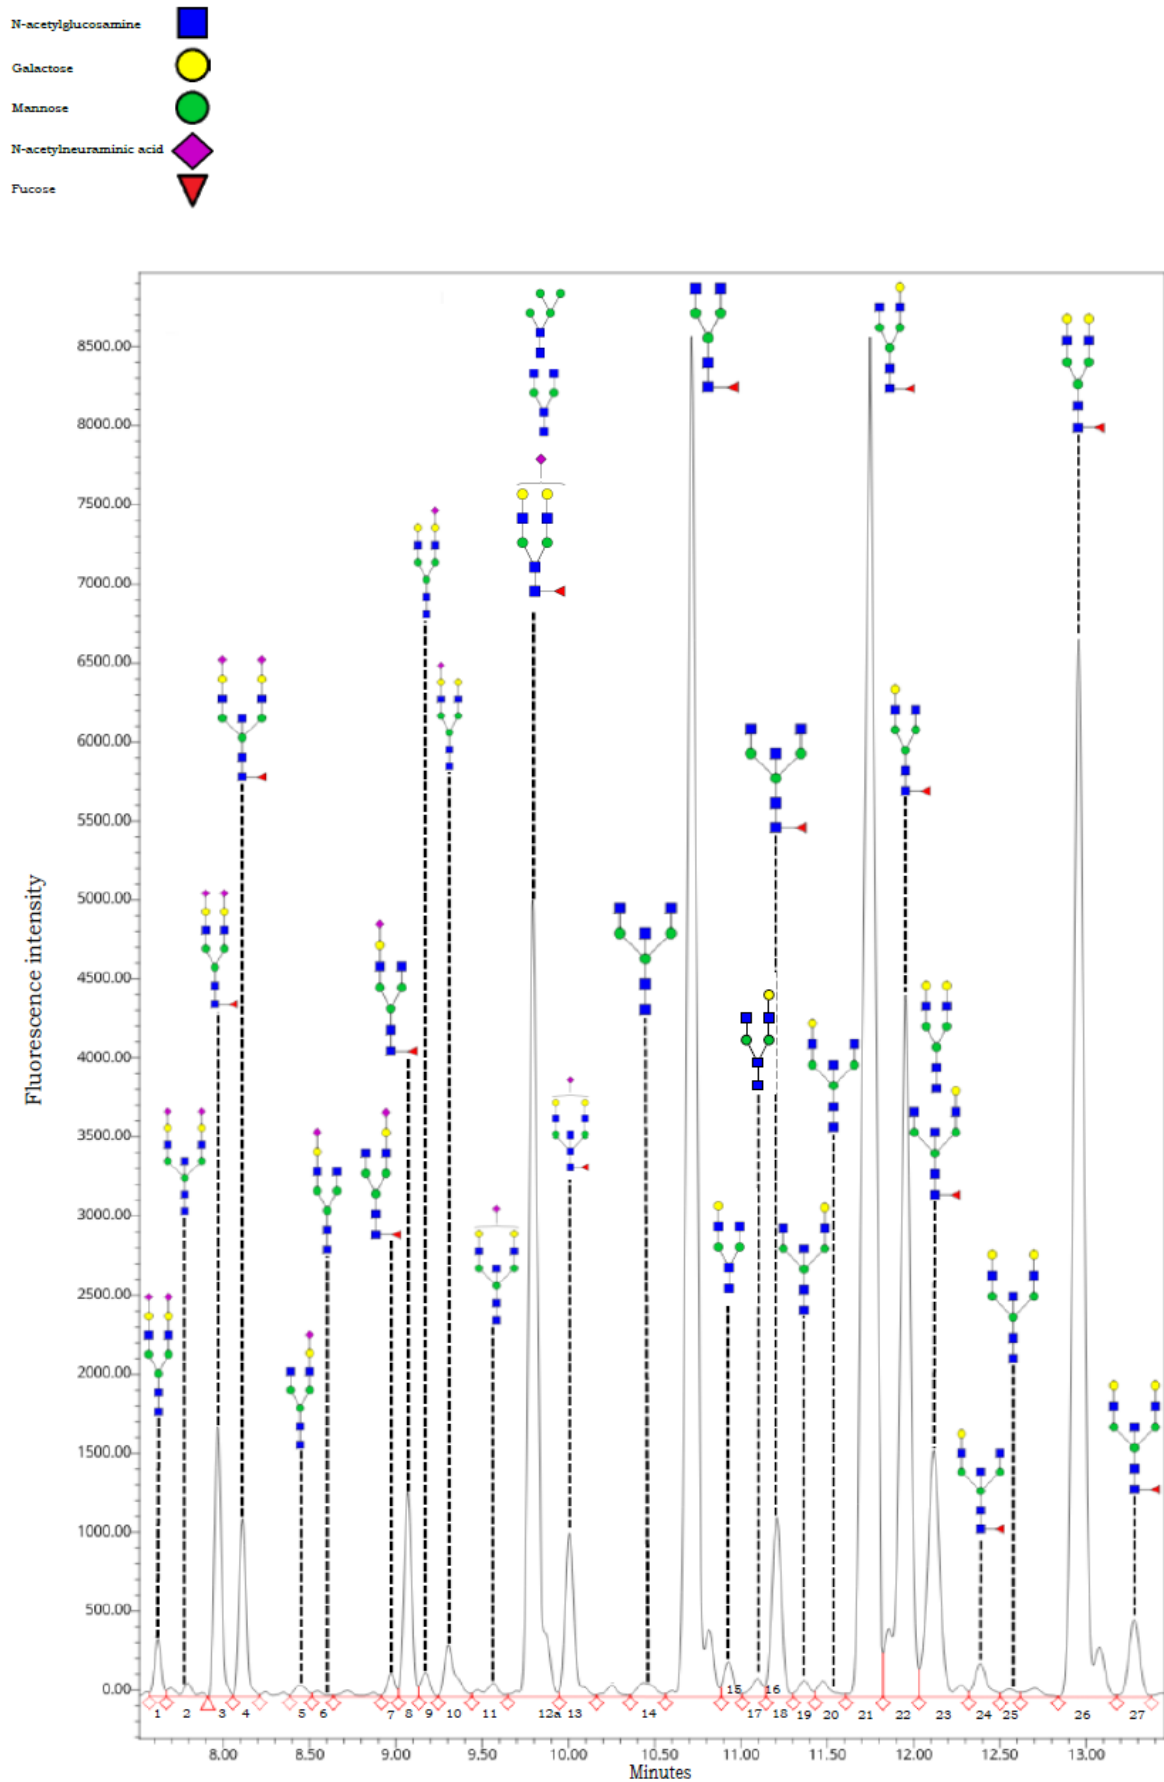

**Figure S1.** The image depicts the modified integrated glycan profile created using Empower 3 software. Each of the 27 peaks is clearly labelled in sequence, and the glycans associated with each peak are accurately identified.
